# Supplementary material for: Upgrading of an index-oriented methodology for consequence analysis of natural hazards: application to the Upper Guil catchment (southern French Alps)
Source: Copernicus journal article supplement (doi:10.5194/nhess-18-2221-2018), 2018-08-23
Supplement: Supplementary file 1 [file nhess-18-2221-2018-supplement.zip]

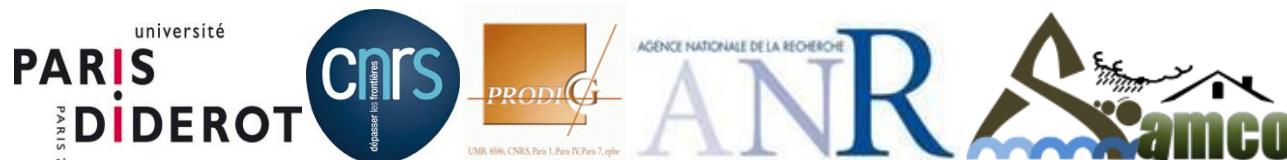

## Enquête sur la perception des risques dans le Queyras

Madame, Monsieur,

Merci de consacrer quelques minutes à répondre à cette enquête. Nous réalisons cette étude dans le cadre d'une recherche scientifique (thèse de doctorat en géographie) sur la gestion des risques naturels dans le Queyras (communes de Ristolas, Abriès, Aiguilles, Château-Ville-Vieille, Molines en Queyras et St-Véran). Vos réponses nous permettront d'améliorer nos connaissances sur ces phénomènes et leurs impacts, et de proposer des actions plus adaptées à vos attentes.

**Nous vous précisons que vos réponses resteront strictement anonymes.**

Nous diffuserons les résultats de cette enquête courant 2015.

Sincères salutations,

Benoît CARLIER  
Doctorant

**Adresse :** Université Paris 7 Diderot, Laboratoire PRODIG (UMR 8586)  
8 place Paul-Ricoeur - 75013 Paris

**Email :** [carlierbenoit@hotmail.fr](mailto:carlierbenoit@hotmail.fr)

**Quelques questions générales**

1. Votre commune \_\_\_\_\_ Lieu dit ? \_\_\_\_\_
2. Depuis combien de temps vivez-vous dans cette commune ? \_\_\_\_\_
3. Combien de générations de votre famille ont vécu dans cette région (en comptant la votre) ? \_\_\_\_\_
4. Concernant votre logement, êtes-vous ?  
☐ propriétaire ☐ locataire ☐ autre : \_\_\_\_\_
5. Est-ce votre résidence principale ou votre résidence secondaire ?  
☐ résidence principale ☐ résidence secondaire
6. Est-ce un ?  
☐ habitat individuel ☐ habitat collectif

**Vous et les risques naturels**

7. Quand vous pensez aux risques naturels dans votre commune, êtes-vous préoccupé ?  
☐ pas du tout ☐ un peu ☐ moyennement ☐ beaucoup ☐ fortement
8. Avez-vous personnellement vécu une catastrophe naturelle ?  
☐ non, et je ne sais pas s'il y en a déjà eu dans ma commune  
☐ non, mais je sais qu'il y en a déjà eu dans ma commune  
☐ oui, mais je n'ai pas été personnellement affecté  
☐ oui, et j'ai été directement affecté

Si vous avez répondu oui, pouvez-vous décrire brièvement quel phénomène naturel était en cause, où et quand cela a eu lieu, ce qui s'est passé, les conséquences et vos impressions :

---

---

---

---

---

|                                         |
|-----------------------------------------|
| Les risques naturels dans votre commune |
|-----------------------------------------|

9. Voici une liste de phénomènes naturels. Veuillez indiquer, pour chacun, à quel point ils vous semblent dangereux dans votre commune. Vous pouvez graduer votre réponse de 1 à 5 (1 étant "sans danger" et 5 "extrêmement dangereux").

|                       | 1 Sans danger            | 2 Peu dangereux          | 3 Assez dangereux        | 4 Très dangereux         | 5 Extrêmement dangereux  |
|-----------------------|--------------------------|--------------------------|--------------------------|--------------------------|--------------------------|
| Glissement de terrain | <input type="checkbox"/> |
| Chute de blocs        | <input type="checkbox"/> |
| Lave torrentielle     | <input type="checkbox"/> |
| Avalanche             | <input type="checkbox"/> |
| Inondation            | <input type="checkbox"/> |
| Feu de forêt          | <input type="checkbox"/> |
| Séismes               | <input type="checkbox"/> |

10. Parmi les événements cités dans la question précédente, lequel vous inquiète le plus ? Pourquoi ? par son intensité, par sa fréquence, ...

---



---



---

11. Voici une liste de propositions à propos des inondations torrentielles dans votre commune. Pour chacune d'entre elles, veuillez indiquer si elle vous semble probable ou non. Vous pouvez graduer vos réponses sur une échelle des 1 à 5, 1 pour "improbable" et 5 pour "très probable".

|                                                                                                  | 1 Improbable             | 2                        | 3                        | 4                        | 5 Très probable          |
|--------------------------------------------------------------------------------------------------|--------------------------|--------------------------|--------------------------|--------------------------|--------------------------|
| Une inondation torrentielle pourrait avoir lieu prochainement dans votre commune                 | <input type="checkbox"/> |
| La prochaine inondation pourrait avoir des conséquences négatives sur votre commune              | <input type="checkbox"/> |
| Vous (ou votre famille) pourriez être blessé lors de la prochaine inondation                     | <input type="checkbox"/> |
| Votre habitation ou propriété pourrait être endommagée par la prochaine inondation               | <input type="checkbox"/> |
| Les réseaux de transport (routes) pourraient être endommagés par la prochaine inondation         | <input type="checkbox"/> |
| Les réseaux essentiels (eau, électricité) pourraient être endommagés par la prochaine inondation | <input type="checkbox"/> |

12. Voici une liste de propositions concernant les glissements de terrain dans votre commune. Pour chacune d'entre elles, veuillez indiquer si elles vous semblent probables ou non. Vous pouvez graduer vos réponses sur une échelle de 1 à 5, avec 1 pour "improbable" et 5 pour "très probable".

|                                                                                                                 | 1 Improbable             | 2                        | 3                        | 4                        | 5 Très probable          |
|-----------------------------------------------------------------------------------------------------------------|--------------------------|--------------------------|--------------------------|--------------------------|--------------------------|
| Un glissement de terrain pourrait avoir lieu prochainement dans votre commune                                   | <input type="checkbox"/> |
| Le prochain glissement de terrain pourrait avoir des conséquences négatives pour votre commune                  | <input type="checkbox"/> |
| Vous (ou votre famille) pourriez être blessé lors du prochain glissement de terrain                             | <input type="checkbox"/> |
| Votre habitation ou propriété pourrait être endommagée par le prochain glissement de terrain                    | <input type="checkbox"/> |
| Les réseaux de transport (routes, ...) pourraient être endommagés par le prochain glissement de terrain         | <input type="checkbox"/> |
| Les réseaux essentiels (eau, électricité, ...) pourraient être endommagés par le prochain glissement de terrain | <input type="checkbox"/> |

13. Voici une liste de propositions à propos des avalanches dans votre commune. Pour chacune d'entre elles, veuillez indiquer si elle vous semble probable ou non. Vous pouvez graduer vos réponses sur une échelle des 1 à 5, 1 pour "improbable" et 5 pour "très probable".

|                                                                                                 | 1 Improbable             | 2                        | 3                        | 4                        | 5 Très probable          |
|-------------------------------------------------------------------------------------------------|--------------------------|--------------------------|--------------------------|--------------------------|--------------------------|
| Une avalanche pourrait avoir lieu prochainement dans votre commune                              | <input type="checkbox"/> |
| La prochaine avalanche pourrait avoir des conséquences négatives sur votre commune              | <input type="checkbox"/> |
| Vous (ou votre famille) pourriez être blessé lors de la prochaine avalanche                     | <input type="checkbox"/> |
| Votre habitation ou propriété pourrait être endommagée par la prochaine avalanche               | <input type="checkbox"/> |
| Les réseaux de transport (routes) pourraient être endommagés par la prochaine avalanche         | <input type="checkbox"/> |
| Les réseaux essentiels (eau, électricité) pourraient être endommagés par la prochaine avalanche | <input type="checkbox"/> |

14. Selon vous, quelles sont les zones les plus concernées par les risques naturels dans votre commune? Vous disposez ci-dessous d'un fond de carte de votre commune : Dessinez et localisez les zones que vous considérez comme exposées aux risques. Pouvez-vous également localiser votre domicile ?

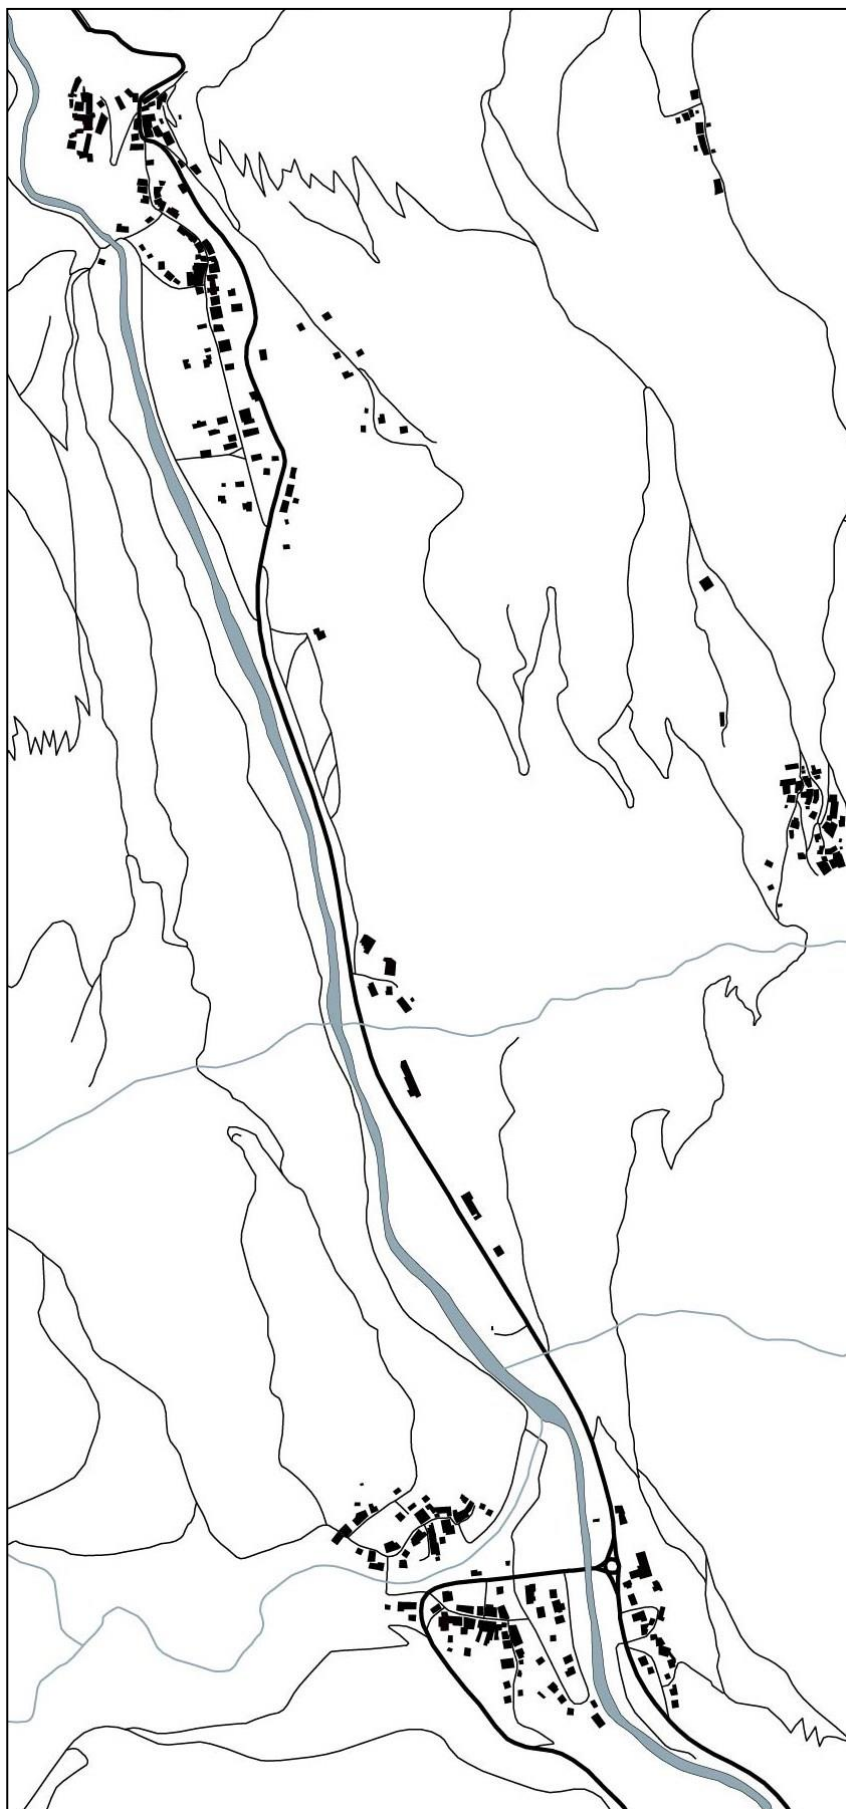

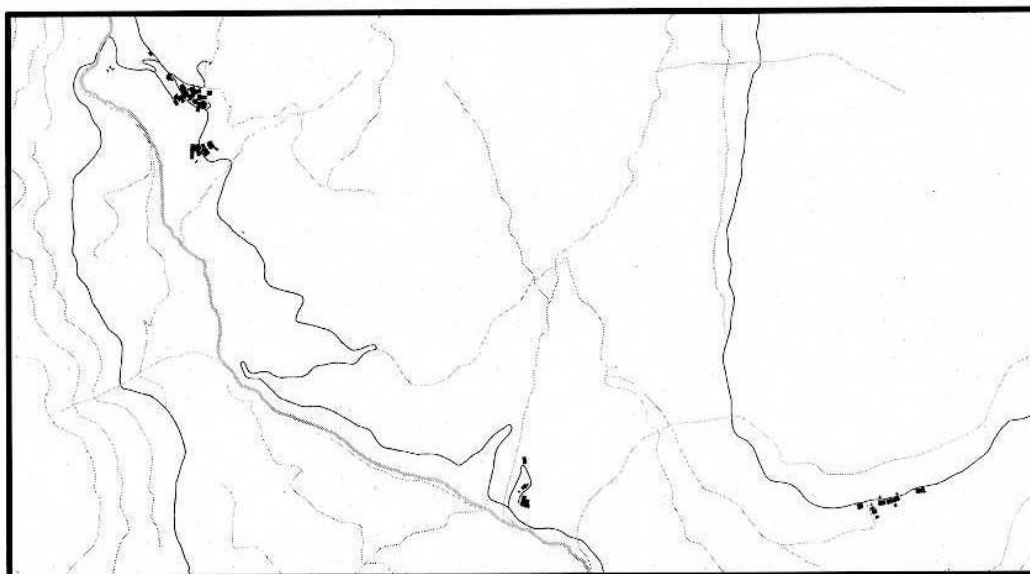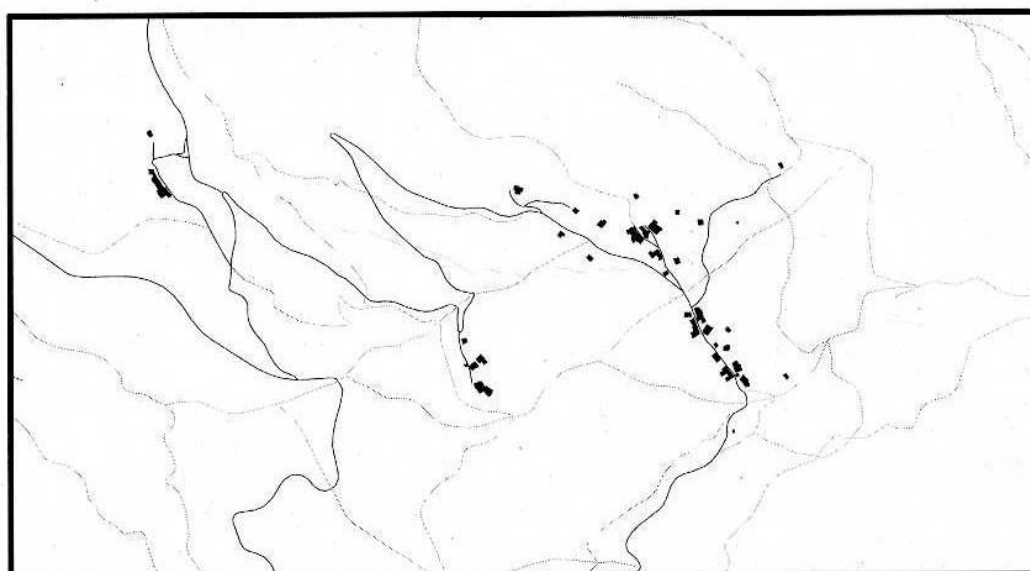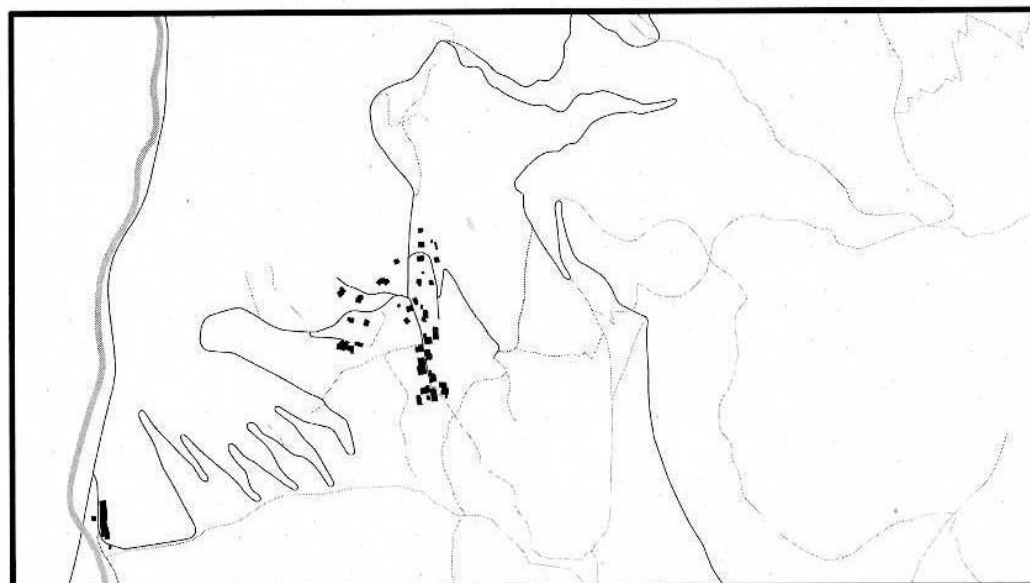

|                                                  |
|--------------------------------------------------|
| Communiquer et informer sur les risques naturels |
|--------------------------------------------------|

15. Avez-vous déjà été informé sur les risques naturels dans votre commune ?

- ☐ oui ☐ non (vous pouvez passer à la question 20)

16. Si vous avez répondu oui à la question précédente, par quel moyen avez-vous été informé ? (vous pouvez cocher plusieurs réponses)

- |                                                         |                                                              |                                           |
|---------------------------------------------------------|--------------------------------------------------------------|-------------------------------------------|
| <input type="checkbox"/> à la radio                     | <input type="checkbox"/> à la télévision                     | <input type="checkbox"/> dans la presse   |
| <input type="checkbox"/> sur Internet                   | <input type="checkbox"/> par une brochure                    | <input type="checkbox"/> par des affiches |
| <input type="checkbox"/> par des amis                   | <input type="checkbox"/> par la mairie                       | <input type="checkbox"/> à l'école        |
| <input type="checkbox"/> par des membres de ma famille  | <input type="checkbox"/> j'ai assisté à une réunion publique |                                           |
| <input type="checkbox"/> j'ai lu des rapports officiels | <input type="checkbox"/> j'ai lu des rapports techniques     |                                           |
| <input type="checkbox"/> autre _____                    |                                                              |                                           |

17. Avez-vous recherché cette information ? (par exemple : vous avez consulté un site Internet, vous avez demandé une information précise à la mairie, vous avez acheté ou emprunté un livre sur le sujet...)

- ☐ oui ☐ non

18. Vous considérez-vous bien informé sur les risques naturels ?

- |                                              |                                             |
|----------------------------------------------|---------------------------------------------|
| <input type="checkbox"/> pas du tout informé | <input type="checkbox"/> faiblement informé |
| <input type="checkbox"/> assez informé       | <input type="checkbox"/> bien informé       |
| <input type="checkbox"/> très bien informé   |                                             |

19. Souhaitez-vous bénéficier de plus d'informations sur les risques naturels ?

- ☐ oui ☐ non

20. Seriez-vous prêt à chercher des informations sur les risques naturels ? (par exemple : consulter un site Internet, interroger une personne qui connaît mieux le sujet que vous, assister à une réunion publique...)

- ☐ oui ☐ non

21. Comment voudriez-vous être informé sur les risques naturels ?

\_\_\_\_\_

22. Selon vous, qui devrait vous informer sur les risques naturels ?

- ☐ la municipalité
 ☐ la communauté de communes  
☐ le département
 ☐ la région  
☐ l'Etat et les ministères
 ☐ les scientifiques  
☐ les médias (journalistes)
 ☐ la sécurité civile  
☐ autre \_\_\_\_\_

23. Voici une liste de personnes ou institutions susceptibles de vous informer sur les risques. Pour chacune, veuillez indiquer à quel point vous leur faites confiance à ce sujet

| Vous faites confiance à cet acteur...        | Pas du tout              | Pas vraiment             | Plus ou moins            | Un peu                   | Tout à fait              |
|----------------------------------------------|--------------------------|--------------------------|--------------------------|--------------------------|--------------------------|
| Les autorités locales / la municipalité      | <input type="checkbox"/> |
| La communauté de communes                    | <input type="checkbox"/> |
| Le département / Le conseil général          | <input type="checkbox"/> |
| La région / Le conseil régional              | <input type="checkbox"/> |
| Les autorités nationales (ministères...)     | <input type="checkbox"/> |
| La police, les pompiers / La sécurité civile | <input type="checkbox"/> |
| Les medias (journalistes)                    | <input type="checkbox"/> |
| Les scientifiques et les experts             | <input type="checkbox"/> |
| Les compagnies d'assurance                   | <input type="checkbox"/> |
| Autres, précisez :<br>_____                  | <input type="checkbox"/> |

24. Est-ce qu'un atelier, une réunion d'information ou un débat public concernant les risques naturels a déjà eu lieu dans votre commune ?

- ☐ oui, et j'y ai participé  
☐ oui, mais je n'y ai pas participé  
☐ non, il n'y en a jamais eu



24.bis :

- ☐ parce que je n'avais pas le temps
- ☐ parce que ça ne m'intéressait pas
- ☐ pour une autre raison \_\_\_\_\_

25. Si nous envisagions d'organiser une réunion publique pour informer les habitants de votre commune sur les risques naturels. Assisteriez-vous à cette réunion ?

☐ oui

☐ non

26. Voici une liste de sujets relatifs aux risques naturels. Pour chacun, veuillez indiquer à quel point vous le trouvez important :

| Disposer d'information à ce sujet est....                                                                                    | Pas important            | Pas très important       | important                | Très important           |
|------------------------------------------------------------------------------------------------------------------------------|--------------------------|--------------------------|--------------------------|--------------------------|
| Le zonage de votre commune concernant les risques naturels (les zones à risque)                                              | <input type="checkbox"/> | <input type="checkbox"/> | <input type="checkbox"/> | <input type="checkbox"/> |
| Les phénomènes naturels (comment ça fonctionne, ce qui les déclenche...)                                                     | <input type="checkbox"/> | <input type="checkbox"/> | <input type="checkbox"/> | <input type="checkbox"/> |
| Ce que les autorités font pour réduire les risques naturels                                                                  | <input type="checkbox"/> | <input type="checkbox"/> | <input type="checkbox"/> | <input type="checkbox"/> |
| Ce que vous pouvez faire vous-même pour être moins vulnérable / exposé aux risques                                           | <input type="checkbox"/> | <input type="checkbox"/> | <input type="checkbox"/> | <input type="checkbox"/> |
| Qui vous devez contacter en cas d'urgence                                                                                    | <input type="checkbox"/> | <input type="checkbox"/> | <input type="checkbox"/> | <input type="checkbox"/> |
| Les conséquences possibles d'une catastrophe naturelle sur les bâtiments et les infrastructures                              | <input type="checkbox"/> | <input type="checkbox"/> | <input type="checkbox"/> | <input type="checkbox"/> |
| La législation relative à l'occupation du sol en fonction des risques naturels                                               | <input type="checkbox"/> | <input type="checkbox"/> | <input type="checkbox"/> | <input type="checkbox"/> |
| Le plan d'évacuation ou les procédures d'urgence (que devez vous faire ? qu'est-ce qui est prévu ? qui est responsable ?...) | <input type="checkbox"/> | <input type="checkbox"/> | <input type="checkbox"/> | <input type="checkbox"/> |
| Les systèmes de surveillance et d'alerte (comment cela fonctionne ?, qui s'en occupe ?)                                      | <input type="checkbox"/> | <input type="checkbox"/> | <input type="checkbox"/> | <input type="checkbox"/> |
| La recherche scientifique et les progrès techniques (ce qui est fait, qui travaille sur le sujet ? à quoi cela sert-il ?...) | <input type="checkbox"/> | <input type="checkbox"/> | <input type="checkbox"/> | <input type="checkbox"/> |

|                                               |
|-----------------------------------------------|
| Connaître les risques naturels et se préparer |
|-----------------------------------------------|

27. Est-ce que des mesures de protection ont été entreprises dans votre commune ? (par exemple un système de drainage, des filets pare-blocs, des digues..., toute installation destinée à réduire les dommages causés par un phénomène naturel).

☐ oui☐ non☐ je ne sais pas

Si oui, lesquelles ?

---



---



---



---

28. Savez-vous ce que vous devriez faire en cas de catastrophe naturelle ?

☐ oui☐ non

Si oui, que doit-on faire en cas de catastrophe naturelle ?

---



---



---



---

29. Connaissez-vous les documents d'information concernant les risques naturels dans votre commune ?

☐ pas du tout☐ un peu☐ assez☐ bien☐ très bien

30. Voici une liste d'acteurs de la gestion des risques. Pour chacun, pouvez-vous indiquer quel est, selon vous, leur niveau de connaissance concernant les risques naturels

| Cet acteur connaît le risque...             | Très mal                 | Mal                      | Peu                      | Bien                     | Très bien                |
|---------------------------------------------|--------------------------|--------------------------|--------------------------|--------------------------|--------------------------|
| Les autorités locales / la municipalité     | <input type="checkbox"/> |
| La communauté de communes                   | <input type="checkbox"/> |
| Le département                              | <input type="checkbox"/> |
| La région                                   | <input type="checkbox"/> |
| Les autorités nationales (ministères...)    | <input type="checkbox"/> |
| La police et les pompiers (sécurité civile) | <input type="checkbox"/> |
| Les médias (journalistes)                   | <input type="checkbox"/> |
| Vous et votre famille                       | <input type="checkbox"/> |
| Les compagnies d'assurance                  | <input type="checkbox"/> |

31. Est-ce que vous (ou l'un de vos proches) a un lien avec les institutions citées dans la question précédente ? Si oui lequel ?

☐ non

☐ oui \_\_\_\_\_

32. Après avoir répondu à ces questions, comment vous sentez-vous vis-à-vis des risques naturels ?

☐  
je n'y penserai  
pas plus

☐  
je suis calme et  
confiant(e)

☐  
cela ne  
m'inquiète pas

☐  
cela m'inquiète

☐  
cela me fait peur

### Quelques questions personnelles

33. Êtes-vous ?

☐ un homme

☐ une femme

34. Quel âge avez-vous ? \_\_\_\_\_

35. A quelle catégorie correspond votre situation professionnelle actuelle ?

☐ agriculteur, exploitant

☐ artisan, commerçant, chef d'entreprise

☐ cadre, profession intellectuelle supérieure, profession libérale

☐ agent de la fonction publique

☐ employé

☐ ouvrier

☐ au foyer

☐ retraité

☐ étudiant

☐ autre, plus précisément \_\_\_\_\_

36. Quel est le plus haut niveau d'études (ou diplôme) que vous avez atteint ?

☐ école primaire / certificat d'études

☐ collège / brevet des collèges

☐ lycée / baccalauréat

☐ BTS / bac+2

☐ licence / bac+3

☐ Master / bac+5

☐ au-delà de bac+5

☐ autre : \_\_\_\_\_

37. Combien de personnes composent votre foyer (vous inclus) ?

Total \_\_\_\_\_

Enfants/jeunes (- de 18 ans) \_\_\_\_\_

Adultes (19-65 ans) \_\_\_\_\_

Personnes âgées (65 ans et +) \_\_\_\_\_
