# Supplementary material for: Upgrading of an index-oriented methodology for consequence analysis of natural hazards: application to the Upper Guil catchment (southern French Alps)
Source: Copernicus journal article supplement (doi:10.5194/nhess-18-2221-2018), 2018-08-23
Supplement: Supplementary file 2 [file nhess-18-2221-2018-supplement.zip]

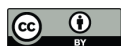

## *Supplement of*

# **Upgrading of an index-oriented methodology for consequence analysis of natural hazards: application to the Upper Guil catchment (southern French Alps)**

**Benoît Carlier et al.**

*Correspondence to:* Benoît Carlier ([carlierbenoit@hotmail.fr](mailto:carlierbenoit@hotmail.fr)) and Anne Puissant ([anne.puissant@live-cnrs.unistra.fr](mailto:anne.puissant@live-cnrs.unistra.fr))

- [nhess-18-2221-2018-supplement-title-page.pdf](#)
- Supplement
  - [Questionnaire.pdf](#)

The copyright of individual parts of the supplement might differ from the CC BY 4.0 License.
